# Supplementary material for: Longitudinal trajectories of hippocampal and prefrontal contributions to episodic retrieval: Effects of age and puberty
Source: PubMed Central journal article supplement — Dev Cogn Neurosci. 2018 Nov 20;36:100599. doi: 10.1016/j.dcn.2018.10.003 (PMC6969281; doi:10.1016/j.dcn.2018.10.003), 2018-11-20
Supplement: mmc1.pdf [file mmc1.pdf]

## Supplementary Results

### Cross-sectional correlations.

Table 1 reports cross-sectional correlations between age, testosterone, and PDS for females (highlighted in pink) and males (highlighted in blue) for each time point.

Table 1.

| Timepoint 1  |         |              |        |
|--------------|---------|--------------|--------|
|              | PDS     | Testosterone | Age    |
| PDS          | --      | 0.45**       | 0.44** |
| Testosterone | 0.40*   | --           | .43**  |
| Age          | 0.25    | 0.51**       | --     |
| Timepoint 2  |         |              |        |
|              | PDS     | Testosterone | Age    |
| PDS          | --      | .39*         | .60**  |
| Testosterone | .55***  | --           | .42**  |
| Age          | .39*    | .41*         | --     |
| Timepoint 3  |         |              |        |
|              | PDS     | Testosterone | Age    |
| PDS          | --      | 0.28         | .56*** |
| Testosterone | 0.61*** | --           | 0.25   |
| Age          | 0.69*** | .52***       | --     |

\* (females=pink, males=blue)

### Inclusion of additional covariates in longitudinal analyses

Supplementary analyses confirmed that all significant findings remained unchanged when we included additional covariates related to motion, “not sure” responses, and total number of trials. Initial values at T1 and change since T1 in each of these variables was added to the final models selected for hippocampus (Table 2) and DLPFC (Table 3).

**Motion.** Motion was measured as the number of repaired volumes based on ArtRepair (>1mm motion or >2% signal change) for each participant. Children’s average number repaired volumes was  $M(SD)=14.22(11.92)$  at T1,  $M(SD)=10.72(10.03)$  at T2, and  $M(SD)=7.87(8.47)$  at T3 corresponding to 4 to 7% of volumes. The number of repaired volumes was negatively related to age at T1 ( $r=-.25, p=.02$ ) and T2 ( $r=-.27, p=.01$ ), and marginally at T3 ( $r=-.20, p=.08$ ). To account for these developmental effects, we added the number of repaired volumes at T1 and change in repaired volumes since T1 in our final models of hippocampal and DLPFC activation. Repaired volumes at T1 was not a significant predictor of activation ( $ps>.29$ ), but change in number of repaired volumes was significant when added to the final hippocampal models (PDS model:  $b=-.01, p=.003$ , Testosterone model:  $b=-.01, p=.003$ ), indicating that children whose number of repaired volumes decreased over time exhibited higher hippocampal activation. Neither initial or change in repaired volumes was significant for the DLPFC models ( $ps>.50$ ). Importantly, all our main findings still held for the both the hippocampal (PDS model: main effect of region  $b=.02, p=.04$ ; time<sup>2</sup>  $b=1.32, p<.001$ ; T1 age x Change in PDS  $b=.15, p<.001$ ; Testosterone model: T1 age x Gender x Change in Testosterone,  $b=-.01, p<.001$ ) and DLPFC models (PDS Model: time<sup>2</sup>  $b=2.02, p<.001$ ; Testosterone model: T1 age x Gender x Change in Testosterone,  $b=-.01, p=.03$ ).

**Not Sure Rates.** “Not sure” rates were measured as the number of “not sure” responses divided by the total number of hits. Children’s “not sure” response rates were  $M(SD)=.26(.19)$  at T1,  $M(SD)=.17(.13)$  at T2, and  $M(SD)=.14(.12)$  at T3. “Not sure” rates negatively associated with age at T1 ( $r=-.33, p=.001$ ) and T2 ( $r=-.25, p=.02$ ), but not T3 ( $r=-.15, p=.19$ ). To account for these developmental effects, we added “not sure” rates at T1 and change in “not sure” rates since T1 in our final models. Neither “not sure” rate at T1 or change in “not sure” rate were significant predictors when added to the final hippocampal models  $p>.49$ ; when added to the final DLPFC model, the change in “not sure” rates marginally predicted DLPFC activation (PDS model:  $b=-.41, p=.06$ , Testosterone model:  $b=-.37, p=.07$ ). However, all our main findings remain significant for the both the hippocampal (PDS model: main effect of region  $b=.02, p=.04$ ; time<sup>2</sup>  $b=1.27, p<.001$ ; T1 age x Change in PDS  $b=.14, p<.001$ ; Testosterone model: T1 age x Gender x Change in Testosterone,  $b=-.01, p<.001$ ) and DLPFC models (PDS Model: time<sup>2</sup>  $b=1.26, p<.001$ ; Testosterone model: T1 age x Gender x Change in Testosterone,  $b=-.01, p=.02$ ).

**Total Number of Trials.** The total number of trials was calculated as the sum of correct and incorrect item-context trials that were included for fMRI activation estimates. Total trial number was  $M(SD)=102(24)$  at T1,  $M(SD)=111(25)$  at T2, and  $M(SD)=119(18)$  at T3. Total trial number was marginally positively associated with age at T1 ( $r=.19, p=.07$ ), significantly at T2 ( $r=.27, p=.02$ ), and not significantly at T3 ( $r=.12, p=.30$ ). To account for these developmental effects, we added total trial number at T1 and change in total trial number since T1 in our final models. Total trial number at T1 was not a significant predictor of activation ( $ps>.27$ ), but change in number of total trials was significant when added to the final hippocampal models (PDS model:  $b=.003, p<.001$ , Testosterone model:  $b=.004, p<.001$ ), indicating that children whose number of total trials increased over time exhibited higher hippocampal activation. Initial total trial number was not significant for the DLPFC models ( $ps>.20$ ) but change in number of total trials was marginal for the model including PDS ( $b=.002, p=.08$ ) and significant for the model including testosterone ( $b=.004, p<.001$ ). Importantly, our main results remain significant for the hippocampal model (PDS model: main effect of region  $b=.02, p=.04$ ; time<sup>2</sup>  $b=1.34, p<.001$ ; T1 age x Change in PDS  $b=.11, p=.006$ ; Testosterone model: T1 age x Gender x Change in Testosterone,  $b=-.01, p<.001$ ). Our main results also remain largely the same for the DLPFC models (PDS Model: time<sup>2</sup>  $b=2.12, p<.001$ ; Testosterone model: T1 age x Gender x Change in Testosterone,  $b=-.01, p=.058$ ), although we note the 3-way interaction was marginal at  $p=.058$ .

Table 2. Longitudinal Model Results for Hippocampal Item-Context Association Activation Including Additional Covariates

|                      |                                              | Hippocampus |        |       |      |       | 95% CI |        |        |
|----------------------|----------------------------------------------|-------------|--------|-------|------|-------|--------|--------|--------|
|                      |                                              | SD          | b      | SE    | df   | t     | p      | Lower  | Upper  |
| <b>PDS</b>           |                                              |             |        |       |      |       |        |        |        |
| <b>Random Effect</b> |                                              |             |        |       |      |       |        |        |        |
|                      | Intercept                                    | 0.284       |        |       |      |       |        | 0.247  | 0.327  |
|                      | Time                                         | 0.248       |        |       |      |       |        | 0.207  | 0.296  |
| <b>Fixed Effect</b>  |                                              |             |        |       |      |       |        |        |        |
|                      | Intercept                                    |             | -0.033 | 0.039 | 1291 | -0.84 | 0.40   | -0.111 | 0.044  |
|                      | Initial Age                                  |             | -0.047 | 0.025 | 117  | -1.93 | 0.06   | -0.096 | 0.001  |
|                      | region:Body                                  |             | 0.024  | 0.012 | 1291 | 2.02  | 0.04   | *      | 0.001  |
|                      | region:Head                                  |             | 0.018  | 0.012 | 1291 | 1.58  | 0.12   |        | -0.005 |
|                      | Time                                         |             | -4.176 | 1.245 | 1291 | -3.35 | <.001  | ***    | -6.619 |
|                      | Time <sup>2</sup>                            |             | 1.362  | 0.346 | 1291 | 3.94  | <.001  | ***    | 0.683  |
|                      | Gender                                       |             | 0.001  | 0.051 | 117  | 0.02  | 0.99   |        | -0.100 |
|                      | Hemisphere                                   |             | 0.001  | 0.010 | 1291 | 0.14  | 0.89   |        | -0.017 |
|                      | Initial PDS                                  |             | 0.010  | 0.057 | 117  | 0.17  | 0.86   |        | -0.103 |
|                      | Change in PDS                                |             | 0.131  | 0.043 | 1291 | 3.04  | 0.002  | **     | 0.046  |
|                      | Initial Repaired Scans                       |             | -0.002 | 0.002 | 117  | -0.86 | 0.39   |        | -0.006 |
|                      | Change in Repaired Scans                     |             | -0.003 | 0.002 | 1291 | -1.50 | 0.13   |        | -0.007 |
|                      | Initial Not Sure Rate                        |             | -0.008 | 0.130 | 117  | -0.06 | 0.95   |        | -0.266 |
|                      | Change in Not Sure Rate                      |             | 0.025  | 0.134 | 1291 | 0.19  | 0.85   |        | -0.238 |
|                      | Initial Trial Count                          |             | 0.000  | 0.001 | 117  | -0.12 | 0.90   |        | -0.002 |
|                      | Change in Trial Count                        |             | 0.002  | 0.001 | 1291 | 3.28  | 0.001  | **     | 0.001  |
|                      | Initial Age*Change in PDS                    |             | 0.119  | 0.041 | 1291 | 2.94  | 0.003  | **     | 0.039  |
| <b>Testosterone</b>  |                                              |             |        |       |      |       |        |        |        |
| <b>Random Effect</b> |                                              |             |        |       |      |       |        |        |        |
|                      | Intercept                                    | 0.291       |        |       |      |       |        | 0.253  | 0.335  |
|                      | Time                                         | 0.287       |        |       |      |       |        | 0.239  | 0.345  |
| <b>Fixed Effect</b>  |                                              |             |        |       |      |       |        |        |        |
|                      | Intercept                                    |             | 0.013  | 0.039 | 1187 | 0.35  | 0.73   |        | -0.063 |
|                      | Initial Age                                  |             | 0.012  | 0.036 | 111  | 0.33  | 0.74   |        | -0.059 |
|                      | region:Body                                  |             | 0.017  | 0.011 | 1187 | 1.57  | 0.12   |        | -0.004 |
|                      | region:Head                                  |             | 0.014  | 0.011 | 1187 | 1.25  | 0.21   |        | -0.008 |
|                      | Time                                         |             | -2.461 | 1.257 | 1187 | -1.96 | 0.05   | *      | -4.928 |
|                      | Time <sup>2</sup>                            |             | 0.921  | 0.331 | 1187 | 2.79  | 0.01   | **     | 0.272  |
|                      | Gender                                       |             | -0.037 | 0.050 | 111  | -0.74 | 0.46   |        | -0.136 |
|                      | Hemisphere                                   |             | 0.004  | 0.009 | 1187 | 0.47  | 0.64   |        | -0.014 |
|                      | Initial Testosterone                         |             | 0.000  | 0.002 | 111  | -0.16 | 0.87   |        | -0.004 |
|                      | Change in Testosterone                       |             | -0.003 | 0.002 | 1187 | -2.00 | 0.05   | *      | -0.006 |
|                      | Initial Repaired Scans                       |             | -0.003 | 0.002 | 111  | -1.24 | 0.22   |        | -0.008 |
|                      | Change in Repaired Scans                     |             | -0.002 | 0.002 | 1187 | -1.32 | 0.19   |        | -0.006 |
|                      | Initial Not Sure Rate                        |             | 0.142  | 0.138 | 111  | 1.03  | 0.31   |        | -0.132 |
|                      | Change in Not Sure Rate                      |             | 0.193  | 0.129 | 1187 | 1.50  | 0.13   |        | -0.060 |
|                      | Initial Trial Count                          |             | -0.001 | 0.001 | 111  | -1.11 | 0.27   |        | -0.003 |
|                      | Change in Trial Count                        |             | 0.004  | 0.001 | 1187 | 6.15  | <.001  | ***    | 0.003  |
|                      | Gender * Change in Testosterone              |             | 0.004  | 0.002 | 1187 | 1.78  | 0.08   | .      | 0.000  |
|                      | Initial Age*Change in Testosterone           |             | 0.008  | 0.001 | 1187 | 5.58  | <.001  | ***    | 0.005  |
|                      | Initial Age * Gender                         |             | -0.025 | 0.046 | 111  | -0.54 | 0.59   |        | -0.115 |
|                      | Initial Age* Gender * Change in Testosterone |             | -0.007 | 0.002 | 1187 | -3.29 | <.001  | ***    | -0.012 |

Table 3. Longitudinal Model Results for DLPFC Item-Context Association Activation Including Additional Covariates

|                      |                                              | DLPFC |        |       |     |       | 95% CI |           |        |
|----------------------|----------------------------------------------|-------|--------|-------|-----|-------|--------|-----------|--------|
|                      |                                              | SD    | b      | SE    | df  | t     | p      | Lower     | Upper  |
| <b>PDS</b>           |                                              |       |        |       |     |       |        |           |        |
| <b>Random Effect</b> |                                              |       |        |       |     |       |        |           |        |
|                      | Intercept                                    | 0.339 |        |       |     |       |        | 0.291     | 0.396  |
|                      | Time                                         | 0.226 |        |       |     |       |        | 0.180     | 0.284  |
| <b>Fixed Effect</b>  |                                              |       |        |       |     |       |        |           |        |
|                      | Intercept                                    |       | -0.018 | 0.056 | 334 | -0.33 | 0.74   | -0.128    | 0.091  |
|                      | Initial Age                                  |       | -0.004 | 0.033 | 117 | -0.11 | 0.92   | -0.069    | 0.062  |
|                      | Time                                         |       | -1.052 | 0.896 | 334 | -1.17 | 0.24   | -2.816    | 0.711  |
|                      | Time <sup>2</sup>                            |       | 2.123  | 0.361 | 334 | 5.88  | <.001  | *** 1.412 | 2.833  |
|                      | Gender                                       |       | -0.147 | 0.070 | 117 | -2.11 | 0.04   | * -0.285  | -0.009 |
|                      | Hemisphere                                   |       | -0.005 | 0.019 | 334 | -0.25 | 0.80   | -0.043    | 0.033  |
|                      | Initial PDS                                  |       | -0.114 | 0.077 | 117 | -1.48 | 0.14   | -0.268    | 0.039  |
|                      | Change in PDS                                |       | 0.106  | 0.069 | 334 | 1.54  | 0.12   | -0.030    | 0.242  |
|                      | Initial Repaired Scans                       |       | -0.003 | 0.003 | 117 | -0.92 | 0.36   | -0.009    | 0.003  |
|                      | Change in Repaired Scans                     |       | 0.004  | 0.003 | 334 | 1.41  | 0.16   | -0.002    | 0.010  |
|                      | Initial Not Sure Rate                        |       | -0.127 | 0.178 | 117 | -0.71 | 0.48   | -0.480    | 0.226  |
|                      | Change in Not Sure Rate                      |       | -0.460 | 0.216 | 334 | -2.13 | 0.03   | * -0.885  | -0.034 |
|                      | Initial Trial Count                          |       | -0.002 | 0.001 | 117 | -1.64 | 0.10   | -0.005    | 0.000  |
|                      | Change in Trial Count                        |       | 0.002  | 0.001 | 334 | 1.95  | 0.05   | * 0.000   | 0.004  |
|                      | Initial Age*Change in PDS                    |       | 0.058  | 0.055 | 334 | 1.04  | 0.30   | -0.051    | 0.166  |
| <b>Testosterone</b>  |                                              |       |        |       |     |       |        |           |        |
| <b>Random Effect</b> |                                              |       |        |       |     |       |        |           |        |
|                      | Intercept                                    | 0.349 |        |       |     |       |        | 0.300     | 0.407  |
|                      | Time                                         | 0.218 |        |       |     |       |        | 0.170     | 0.278  |
| <b>Fixed Effect</b>  |                                              |       |        |       |     |       |        |           |        |
|                      | Intercept                                    |       | 0.012  | 0.050 | 304 | 0.24  | 0.81   | -0.086    | 0.110  |
|                      | Initial Age                                  |       | -0.001 | 0.047 | 111 | -0.02 | 0.98   | -0.095    | 0.093  |
|                      | Time                                         |       | -0.611 | 0.703 | 304 | -0.87 | 0.39   | -1.994    | 0.772  |
|                      | Time <sup>2</sup>                            |       | 1.643  | 0.347 | 304 | 4.73  | <.001  | *** 0.960 | 2.326  |
|                      | Gender                                       |       | -0.152 | 0.067 | 111 | -2.29 | 0.02   | * -0.284  | -0.020 |
|                      | Hemisphere                                   |       | 0.001  | 0.019 | 304 | 0.06  | 0.95   | -0.036    | 0.038  |
|                      | Initial Testosterone                         |       | -0.003 | 0.003 | 111 | -1.30 | 0.20   | -0.008    | 0.002  |
|                      | Change in Testosterone                       |       | -0.004 | 0.003 | 304 | -1.47 | 0.14   | -0.009    | 0.001  |
|                      | Initial Repaired Scans                       |       | -0.001 | 0.003 | 111 | -0.37 | 0.72   | -0.007    | 0.005  |
|                      | Change in Repaired Scans                     |       | 0.005  | 0.003 | 304 | 1.69  | 0.09   | -0.001    | 0.010  |
|                      | Initial Not Sure Rate                        |       | -0.022 | 0.185 | 111 | -0.12 | 0.90   | -0.389    | 0.345  |
|                      | Change in Not Sure Rate                      |       | -0.326 | 0.207 | 304 | -1.57 | 0.12   | -0.732    | 0.081  |
|                      | Initial Trial Count                          |       | -0.001 | 0.001 | 111 | -0.71 | 0.48   | -0.004    | 0.002  |
|                      | Change in Trial Count                        |       | 0.004  | 0.001 | 304 | 3.74  | <.001  | *** 0.002 | 0.006  |
|                      | Gender * Change in Testosterone              |       | 0.007  | 0.003 | 304 | 2.14  | 0.03   | * 0.001   | 0.014  |
|                      | Initial Age*Change in Testosterone           |       | 0.006  | 0.003 | 304 | 2.23  | 0.03   | * 0.001   | 0.011  |
|                      | Initial Age * Gender                         |       | 0.007  | 0.060 | 111 | 0.12  | 0.90   | -0.112    | 0.127  |
|                      | Initial Age* Gender * Change in Testosterone |       | -0.007 | 0.004 | 304 | -2.02 | 0.04   | * -0.015  | 0.000  |

## Supplementary Figures

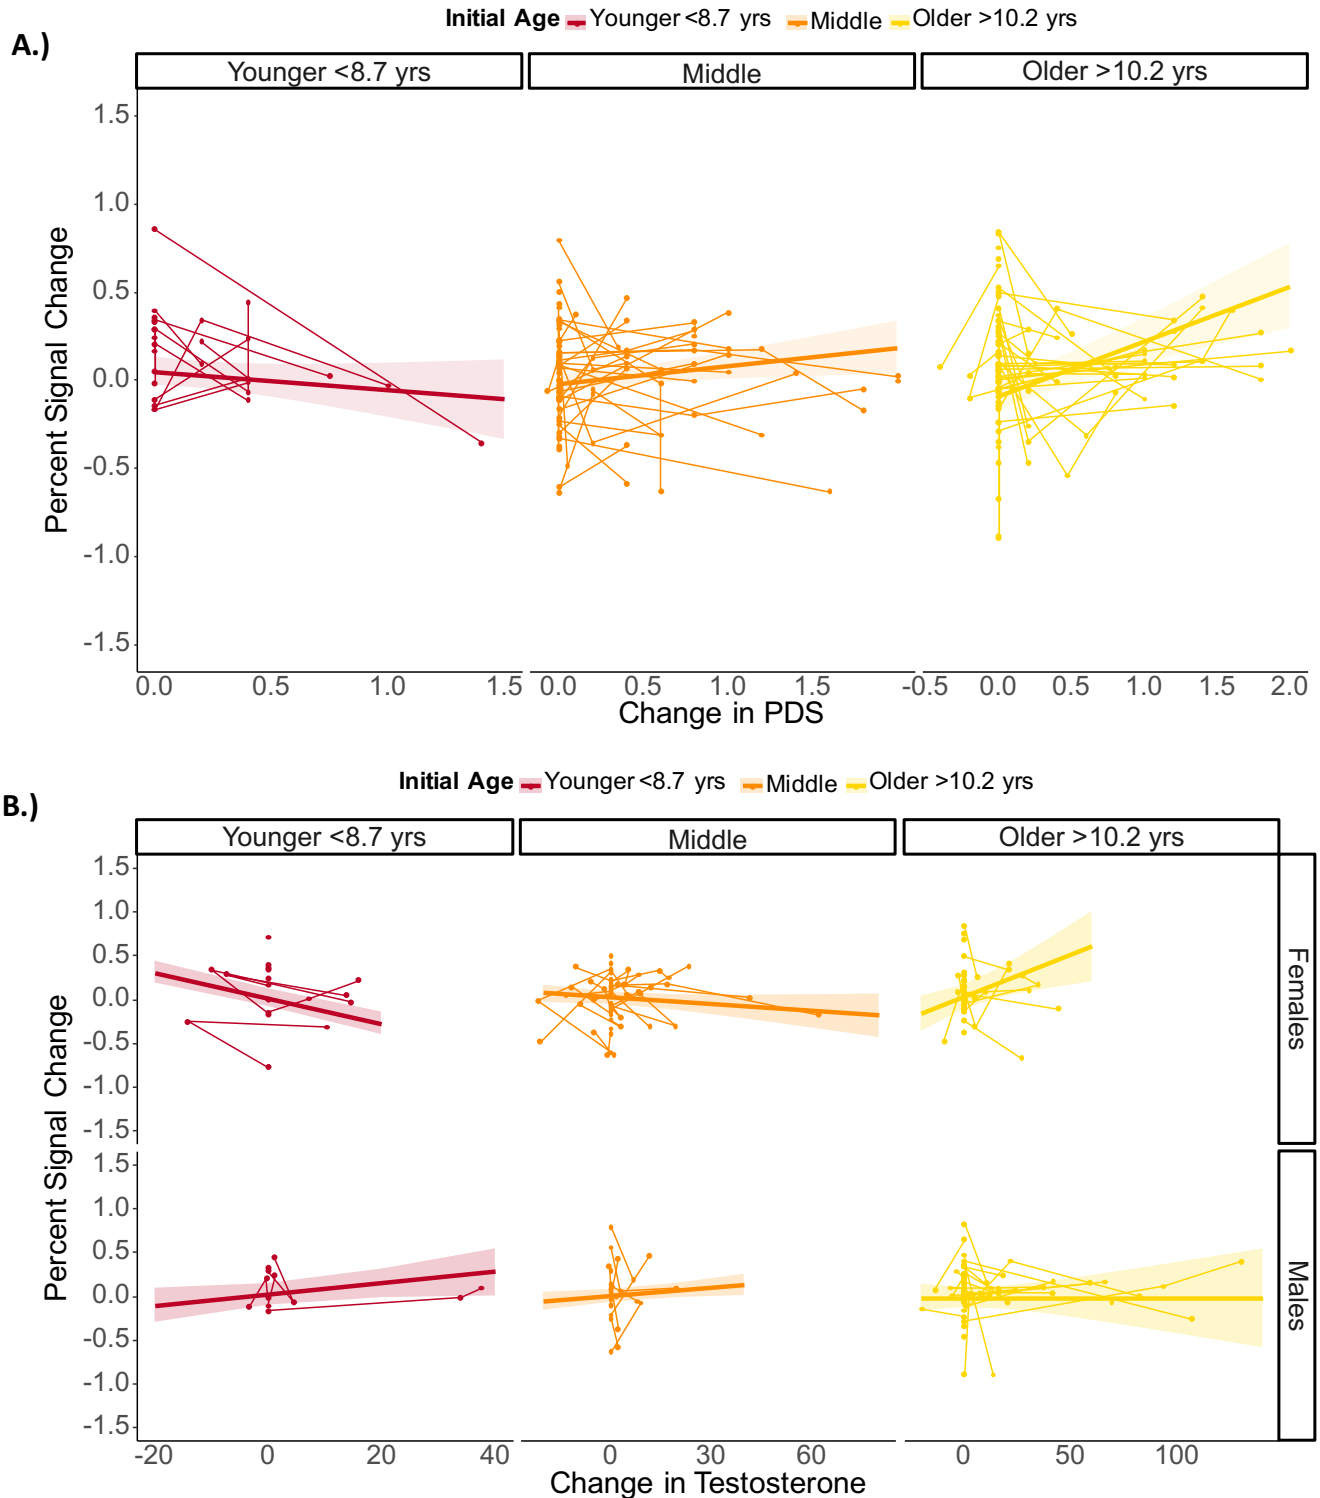

**Figure 1.** Longitudinal results for hippocampal item-context association activation. A.) depicts the change in puberty score by initial age interaction, and B.) depicts the change in testosterone by initial age by gender interaction. Individual values are plotted by points and individual participants are connected by horizontal lines. Participants were separated into three age groups based on initial age (younger <8.7 yrs, middle >8.7 and <10.2, older >10.2 yrs). The plotted regression lines were estimated from the full longitudinal models reported in the manuscript for three specific initial ages (8.7 years, 10.2 years, and 11.7 years).

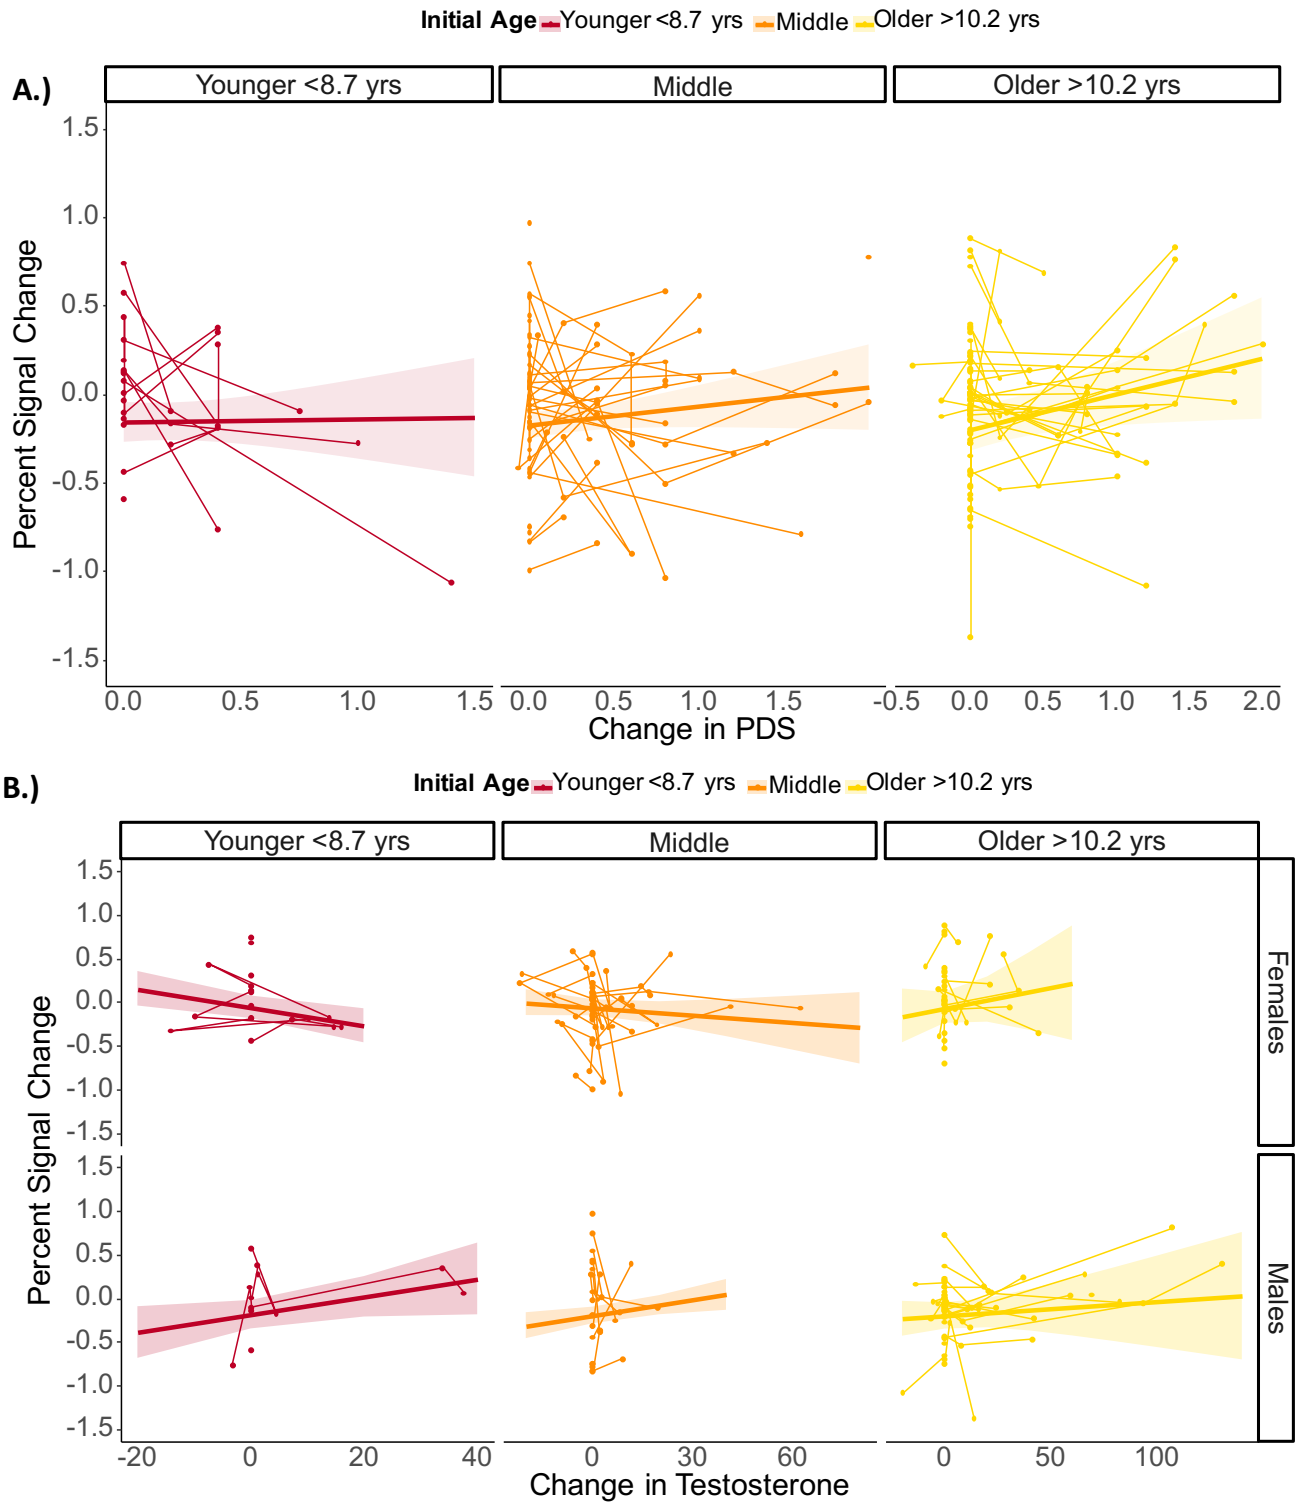

**Figure 2.** Longitudinal results for DLPFC item-context association activation. A.) depicts the change in puberty score by initial age interaction, and B.) depicts the change in testosterone by initial age by gender interaction. Individual values are plotted by points and individual participants are connected by horizontal lines. Participants were separated into three age groups based on initial age (younger <8.7 yrs, middle >8.7 and <10.2, older >10.2 yrs). The plotted regression lines were estimated from the full longitudinal models reported in the manuscript for three specific initial ages (8.7 years, 10.2 years, and 11.7 years).
